# Supplementary material for: Enhanced film quality of PbS QD solid by eliminating the oxide traps through an in situ surface etching and passivation
Source: Royal Society of Chemistry journal article supplement (doi:10.1039/d2dt03238d), 2022-12-27
Supplement: d2dt03238d1.pdf [file d2dt03238d1.pdf]

## Support Information

### Enhanced film quality of PbS QD solid by Eliminating the oxide traps through an in-situ surface etching and passivation

Lianjun Jia, Liangliang Wang, Yuan Lin, Xiaowen Zhou, Jianguang Jia

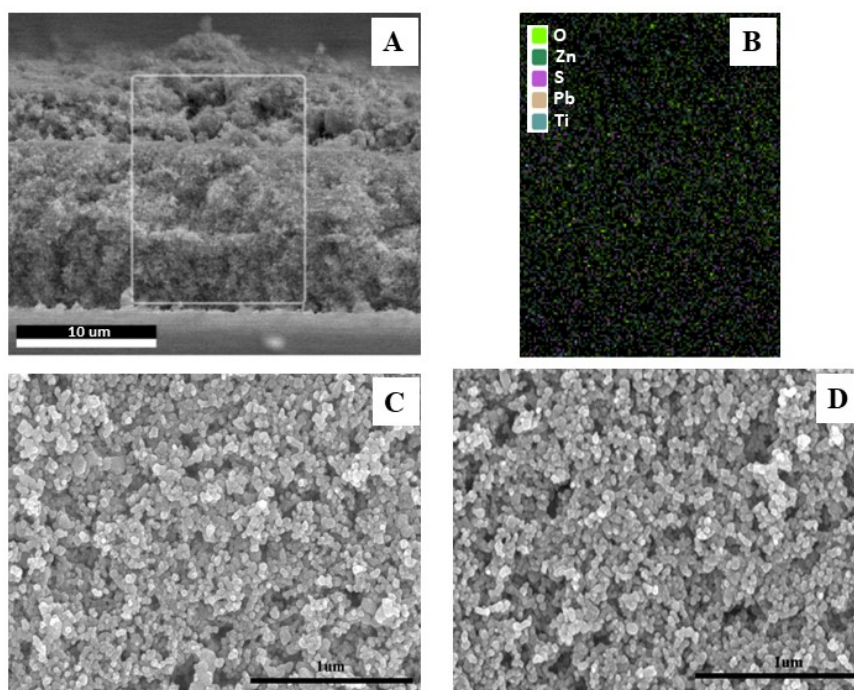

**Figure S1** (A) Cross-sectional image of the pristine PbS/ZnS film, (B) elemental mapping of PbS/ZnS film in the rectangular area in (A), (C,D) top view SEM images of PbS/ZnS film before (C) and after (D) I<sup>-</sup>/I<sub>2</sub> treatment.

**Table S.** Photovoltaic parameters and their average with standard deviation of five PbS QDSSCs with (T) and without (N) I/I<sub>2</sub> treatment.

| cell    | Treatment | $J_{SC}$ (mA.cm <sup>-2</sup> ) | $V_{OC}$ (mV) | FF         | $\eta$ (%) |
|---------|-----------|---------------------------------|---------------|------------|------------|
| 1       | N         | 19.73                           | 378           | 0.535      | 3.96       |
|         | T         | 21.17                           | 418           | 0.536      | 4.71       |
| 2       | N         | 19.26                           | 382           | 0.542      | 3.92       |
|         | T         | 21.04                           | 428           | 0.533      | 4.77       |
| 3       | N         | 19.89                           | 392           | 0.524      | 4.01       |
|         | T         | 22.2                            | 422           | 0.511      | 4.7        |
| 4       | N         | 19.77                           | 393           | 0.528      | 4.02       |
|         | T         | 22.29                           | 423           | 0.519      | 4.8        |
| 5       | N         | 18.84                           | 386           | 0.551      | 4          |
|         | T         | 21.35                           | 421           | 0.544      | 4.82       |
| Average | N         | 19.50±0.66                      | 386±8         | 0.536±0.02 | 3.98±0.06  |
|         | T         | 21.61±0.68                      | 422±6         | 0.529±0.02 | 4.76±0.06  |

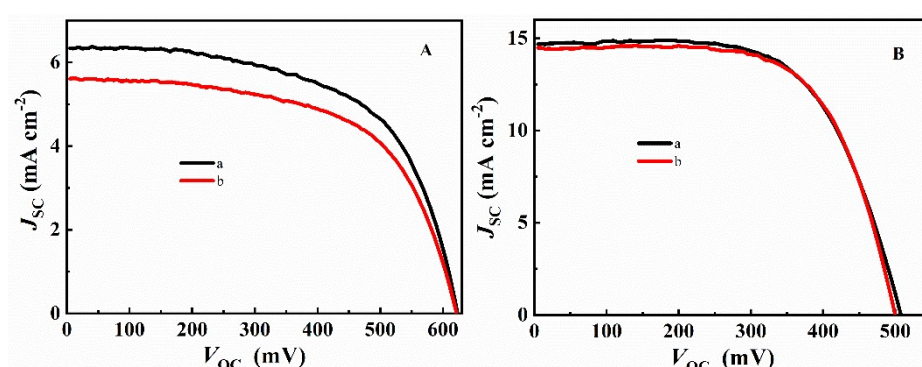

**Figure S2.**  $J$ - $V$  curves of CdS (A) and CdS/CdSe (B) sensitized QDSSCs without (a) and with (b) I/I<sub>2</sub> treatment.

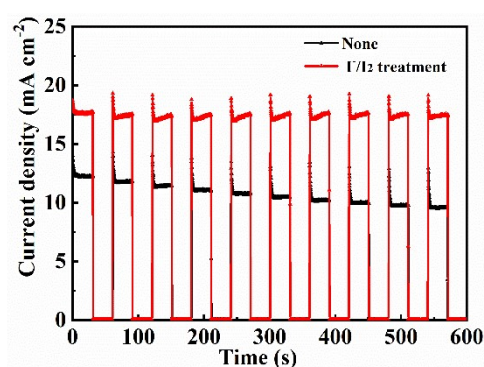

**Figure S3.** Short circuit photocurrent density of QDSSC of TiO<sub>2</sub>/PbS with and without I/I<sub>2</sub> treatment as a function of time using periodic illumination intervals.
